# Supplementary material
Source: PubMed Central journal article supplement (PMC4622851)
Supplement: jcav06p1214s1.pdf [file jcav06p1214s1.pdf]

## **Supporting Information**

### **Figure S1**

The analysis workflow for microarray datasets and CMap compounds screen. Details for microarray analysis with dChip were listed in methods section. The lung AC signatures drawn from differential expression analysis were used to query CMap for screening candidates, only compounds with negative scores and  $p$ -values less than 0.05 were retained as potential therapeutic agents for lung AC.

### **Table S1**

Summary of microarray dataset GSE7670.

**Figure S1**

**Gene Expression Omnibus(GEO)**

**GSE 7670**

**Differential genes detection  
dChip analysis**

Import expression file, gene  
information and CDF file

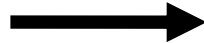

Normalize and compute  
signal values for expression level

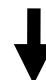

Differential genes

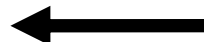

Compare between two groups  
 $E/B > 2$  or  $B/E < 2$

**Lung adenocarcinoma gene signatures  
(Probes for up- and down-regulated genes)**

**Screening candidate drugs  
CMap analysis**

**Candidate compounds ranked by enrichment score and  $p$ -value**

# Table S1

| <b>GEO datasets</b>               | <b>GSE7670</b>                                                                                                                                                                                                      |                     |
|-----------------------------------|---------------------------------------------------------------------------------------------------------------------------------------------------------------------------------------------------------------------|---------------------|
| <b>Organism</b>                   | Homo sapiens                                                                                                                                                                                                        |                     |
| <b>Source</b>                     | Taipei Veterans General Hospital, china                                                                                                                                                                             |                     |
| <b>Platforms</b>                  | Affymetrix HG-U133A                                                                                                                                                                                                 |                     |
| <b>Characteristics</b>            | Adjacent normal-tumor matched lung cancer samples were selected at early and late stages. Totally, 66 samples including patient samples, other lung or lung AC tissue or cell lines were involved in this data set. |                     |
| <b>Detail samples information</b> | 54 paired samples were selected in our study                                                                                                                                                                        |                     |
|                                   | Normal lung                                                                                                                                                                                                         | Lung adenocarcinoma |
|                                   | GSM185811                                                                                                                                                                                                           | GSM185812           |
|                                   | GSM185813                                                                                                                                                                                                           | GSM185814           |
|                                   | GSM185815                                                                                                                                                                                                           | GSM185816           |
|                                   | GSM185817                                                                                                                                                                                                           | GSM185818           |
|                                   | GSM185819                                                                                                                                                                                                           | GSM185820           |
|                                   | GSM185821                                                                                                                                                                                                           | GSM185822           |
|                                   | GSM185823                                                                                                                                                                                                           | GSM185824           |
|                                   | GSM185825                                                                                                                                                                                                           | GSM185826           |
|                                   | GSM185827                                                                                                                                                                                                           | GSM185828           |
|                                   | GSM185829                                                                                                                                                                                                           | GSM185830           |
|                                   | GSM185831                                                                                                                                                                                                           | GSM185832           |
|                                   | GSM185833                                                                                                                                                                                                           | GSM185834           |
|                                   | GSM185835                                                                                                                                                                                                           | GSM185836           |
|                                   | GSM185837                                                                                                                                                                                                           | GSM185838           |
|                                   | GSM185839                                                                                                                                                                                                           | GSM185840           |
|                                   | GSM185841                                                                                                                                                                                                           | GSM185842           |
|                                   | GSM185843                                                                                                                                                                                                           | GSM185844           |
|                                   | GSM185845                                                                                                                                                                                                           | GSM185846           |
|                                   | GSM185847                                                                                                                                                                                                           | GSM185848           |
|                                   | GSM185849                                                                                                                                                                                                           | GSM185850           |
|                                   | GSM185851                                                                                                                                                                                                           | GSM185852           |
|                                   | GSM185853                                                                                                                                                                                                           | GSM185854           |
|                                   | GSM185855                                                                                                                                                                                                           | GSM185856           |
|                                   | GSM185857                                                                                                                                                                                                           | GSM185858           |
| GSM185859                         | GSM185860                                                                                                                                                                                                           |                     |
| GSM185861                         | GSM185862                                                                                                                                                                                                           |                     |
| GSM185863                         | GSM185864                                                                                                                                                                                                           |                     |
